# Supplementary material for: Global transcriptomic changes in glomerular endothelial cells in mice with podocyte depletion and glomerulosclerosis
Source: PubMed Central journal article supplement (PMC8270962; doi:10.1038/s41419-021-03951-x), 2021-07-09
Supplement: 41419_2021_3951_MOESM1_ESM.pdf [file 41419_2021_3951_MOESM1_ESM.pdf]

## Supp. Figures

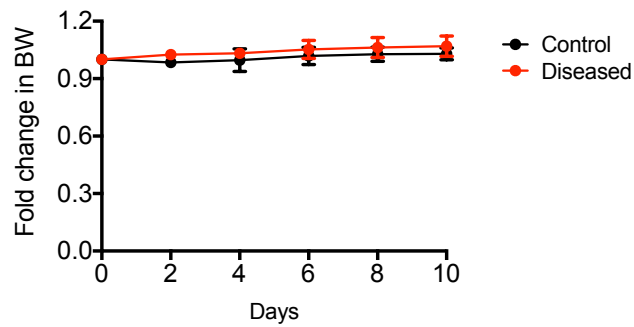

**S. Fig. 1: Fold change in body weight of DT-injected mice.** Body weight of mice are shown as a fold change from before and after DT injection (n=5-6 mice per group).

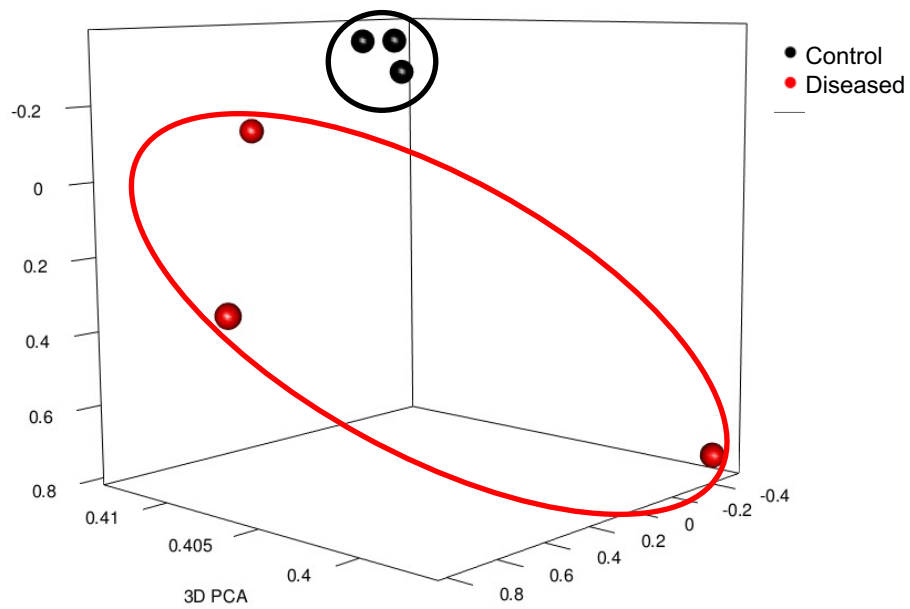

**S. Fig. 2: Principal component analysis of genes from isolated GECs from control and diseased mice.** Each sample represents genes from pooled GECs from 4 mice (n=3 samples per group, GECs pooled from 4 mice per sample).

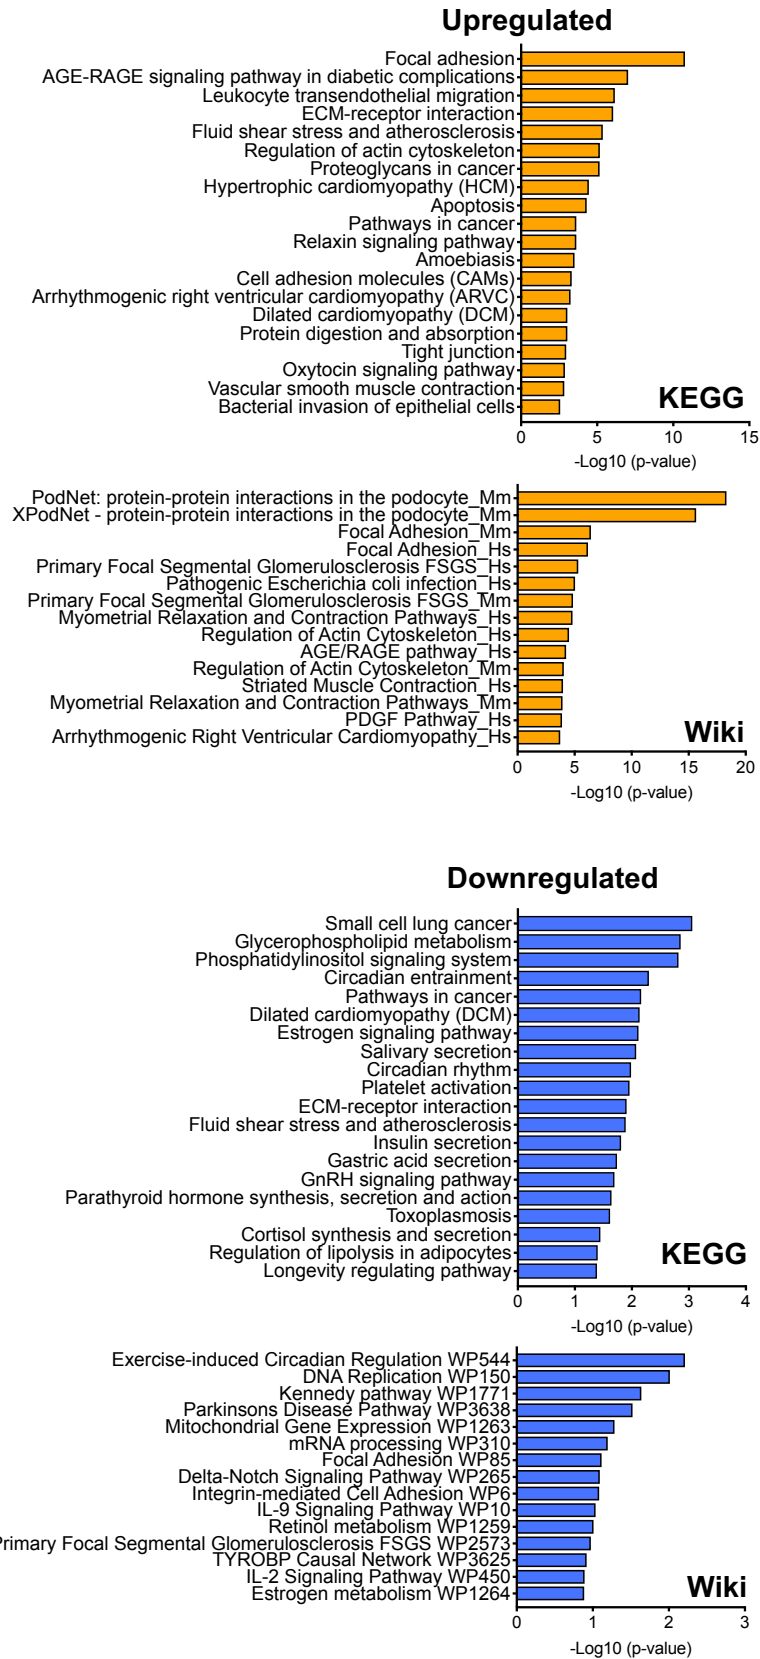

**S. Fig. 3: Pathway analysis of differentially genes in isolated GECs from diseased vs control mice.** Top 20 by KEGG pathway and top 15 Wiki pathway analyses of upregulated (top) and downregulated (bottom) DEGs are shown.

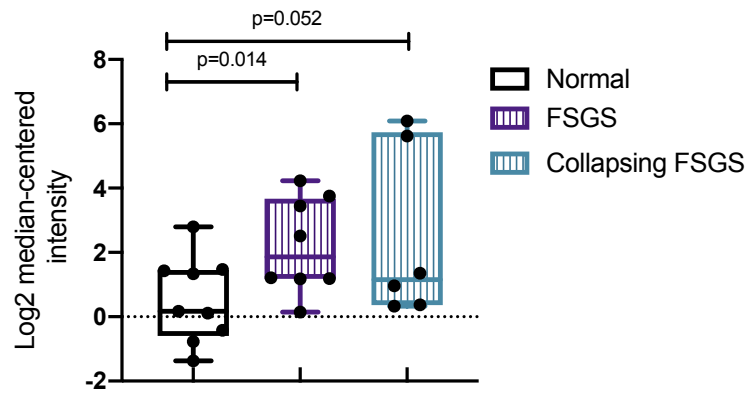

**S. Fig. 4: Expression of SPP1 in human FSGS.** Glomerular *SPP1* mRNA expression in kidneys of patients with primary classic FSGS (n=8), collapsing FSGS (n=6) and normal control (n=9) in Nephroseq database (*nephroseq.org*). Dataset from Hodgin et al.
